# Supplementary material for: Competitiveness of the Exotic Silphium perfoliatum against the Native Urtica dioica: A Field Experiment
Source: Hindawi journal article supplement (doi:10.1155/2023/5512148), 2023-06-27
Supplement: f1 [file 5512148.f1.txt]

year	precipitation_mm	block	code	central_spec	surrounding_spec	biomass_dw_g	height_m	shoots_alive_per_plant	projection_area_m^2	capitula_per_plant	fruits_per_capitulum
1	226	A	A-solo-S1	S	N	414.73	NA	0	NA	NA	NA
1	226	A	A-solo-S2	S	N	283.83	NA	0	NA	NA	NA
1	226	A	A-solo-S3	S	N	426.77	NA	0	NA	NA	NA
1	226	B	B-solo-S4	S	N	439.02	NA	1	NA	NA	NA
1	226	B	B-solo-S5	S	N	339.63	NA	0	NA	NA	NA
1	226	B	B-solo-S6	S	N	572.62	NA	0	NA	NA	NA
1	226	C	C-solo-S7	S	N	450.23	NA	0	NA	NA	NA
1	226	C	C-solo-S8	S	N	330.26	NA	0	NA	NA	NA
1	226	C	C-solo-S9	S	N	424.26	NA	0	NA	NA	NA
1	226	A	A-mono-S1	S	S	91.96	NA	0	NA	NA	NA
1	226	A	A-mono-S2	S	S	50.98	NA	0	NA	NA	NA
1	226	A	A-mono-S3	S	S	114.23	NA	0	NA	NA	NA
1	226	B	B-mono-S4	S	S	176.03	NA	1	NA	NA	NA
1	226	B	B-mono-S5	S	S	96.88	NA	0	NA	NA	NA
1	226	B	B-mono-S6	S	S	146.06	NA	1	NA	NA	NA
1	226	C	C-mono-S7	S	S	127.05	NA	1	NA	NA	NA
1	226	C	C-mono-S8	S	S	48.69	NA	0	NA	NA	NA
1	226	C	C-mono-S9	S	S	114.97	NA	0	NA	NA	NA
1	226	A	A-konk-S1	S	U	19.78	NA	0	NA	NA	NA
1	226	A	A-konk-S2	S	U	54.77	NA	0	NA	NA	NA
1	226	A	A-konk-S3	S	U	62.46	NA	1	NA	NA	NA
1	226	B	B-konk-S4	S	U	NA	NA	NA	NA	NA	NA
1	226	B	B-konk-S5	S	U	34.28	NA	0	NA	NA	NA
1	226	B	B-konk-S6	S	U	13.02	NA	0	NA	NA	NA
1	226	C	C-konk-S7	S	U	42.68	NA	0	NA	NA	NA
1	226	C	C-konk-S8	S	U	52.97	NA	1	NA	NA	NA
1	226	C	C-konk-S9	S	U	48.59	NA	1	NA	NA	NA
1	226	A	A solo-U 1	U	N	NA	1.05	NA	NA	NA	NA
1	226	A	A solo-U 2	U	N	NA	1.00	NA	NA	NA	NA
1	226	A	A solo-U 3	U	N	NA	1.00	NA	NA	NA	NA
1	226	B	B solo-U 4	U	N	NA	1.25	NA	NA	NA	NA
1	226	B	B solo-U 5	U	N	NA	1.95	NA	NA	NA	NA
1	226	B	B solo-U 6	U	N	NA	1.25	NA	NA	NA	NA
1	226	C	C solo-U 7	U	N	NA	1.35	NA	NA	NA	NA
1	226	C	C solo-U 8	U	N	NA	1.55	NA	NA	NA	NA
1	226	C	C solo-U 9	U	N	NA	1.30	NA	NA	NA	NA
1	226	A	A konk-U 1	U	S	NA	1.15	NA	NA	NA	NA
1	226	A	A konk-U 2	U	S	NA	1.10	NA	NA	NA	NA
1	226	A	A konk-U 3	U	S	NA	1.20	NA	NA	NA	NA
1	226	B	B konk-U 4	U	S	NA	0.80	NA	NA	NA	NA
1	226	B	B konk-U 5	U	S	NA	1.15	NA	NA	NA	NA
1	226	B	B konk-U 6	U	S	NA	1.10	NA	NA	NA	NA
1	226	C	C konk-U 7	U	S	NA	1.15	NA	NA	NA	NA
1	226	C	C konk-U 8	U	S	NA	1.30	NA	NA	NA	NA
1	226	C	C konk-U 9	U	S	NA	1.25	NA	NA	NA	NA
1	226	A	A mono-U 1	U	U	NA	1.35	NA	NA	NA	NA
1	226	A	A mono-U 2	U	U	NA	1.35	NA	NA	NA	NA
1	226	A	A mono-U 3	U	U	NA	1.25	NA	NA	NA	NA
1	226	B	B mono-U 4	U	U	NA	1.05	NA	NA	NA	NA
1	226	B	B mono-U 5	U	U	NA	1.05	NA	NA	NA	NA
1	226	B	B mono-U 6	U	U	NA	1.25	NA	NA	NA	NA
1	226	C	C mono-U 7	U	U	NA	1.25	NA	NA	NA	NA
1	226	C	C mono-U 8	U	U	NA	1.20	NA	NA	NA	NA
1	226	C	C mono-U 9	U	U	NA	1.05	NA	NA	NA	NA
2	318	A	A-solo-S1	S	N	2064.96	2.40	16	3.43	363	38
2	318	A	A-solo-S2	S	N	1735.60	2.40	19	1.87	280	27
2	318	A	A-solo-S3	S	N	2423.36	2.60	26	2.83	523	25
2	318	B	B-solo-S4	S	N	1030.17	2.45	23	0.79	180	27
2	318	B	B-solo-S5	S	N	2569.06	2.30	22	2.54	451	34
2	318	B	B-solo-S6	S	N	3227.39	2.20	19	3.14	485	37
2	318	C	C-solo-S7	S	N	2632.62	2.60	23	4.52	403	41
2	318	C	C-solo-S8	S	N	1470.32	2.30	20	2.14	157	30
2	318	C	C-solo-S9	S	N	2113.44	2.40	30	4.95	366	35
2	318	A	A-mono-S1	S	S	195.03	2.30	5	0.42	1	26
2	318	A	A-mono-S2	S	S	167.13	2.30	4	0.28	20	24
2	318	A	A-mono-S3	S	S	250.78	2.40	7	1.30	45	26
2	318	B	B-mono-S4	S	S	561.74	2.40	8	0.50	66	34
2	318	B	B-mono-S5	S	S	332.05	2.40	8	0.24	23	31
2	318	B	B-mono-S6	S	S	312.03	2.40	8	0.38	40	27
2	318	C	C-mono-S7	S	S	248.75	2.50	6	0.55	26	23
2	318	C	C-mono-S8	S	S	210.82	2.40	5	0.63	24	37
2	318	C	C-mono-S9	S	S	388.57	2.40	13	0.33	23	33
2	318	A	A-konk-S1	S	U	127.37	2.10	3	0.19	37	26
2	318	A	A-konk-S2	S	U	192.91	2.10	5	0.22	23	30
2	318	A	A-konk-S3	S	U	238.57	2.25	4	0.24	51	29
2	318	B	B-konk-S4	S	U	NA	NA	NA	NA	NA	NA
2	318	B	B-konk-S5	S	U	197.22	2.30	5	0.95	43	33
2	318	B	B-konk-S6	S	U	120.94	1.90	3	0.79	26	22
2	318	C	C-konk-S7	S	U	158.61	1.90	4	1.63	40	34
2	318	C	C-konk-S8	S	U	262.61	2.30	4	0.50	62	40
2	318	C	C-konk-S9	S	U	190.38	2.20	6	2.20	28	33
2	318	A	A-solo-U1	U	N	NA	2.10	NA	2.09	NA	NA
2	318	A	A-solo-U2	U	N	NA	2.00	NA	1.04	NA	NA
2	318	A	A-solo-U3	U	N	NA	2.20	NA	1.98	NA	NA
2	318	B	B-solo-U4	U	N	NA	1.80	NA	2.54	NA	NA
2	318	B	B-solo-U5	U	N	NA	2.50	NA	1.63	NA	NA
2	318	B	B-solo-U6	U	N	NA	2.00	NA	2.27	NA	NA
2	318	C	C-solo-U7	U	N	NA	1.90	NA	1.27	NA	NA
2	318	C	C-solo-U8	U	N	NA	2.20	NA	2.40	NA	NA
2	318	C	C-solo-U9	U	N	NA	2.25	NA	0.42	NA	NA
2	318	A	A-konk-U1	U	S	NA	2.40	NA	2.69	NA	NA
2	318	A	A-konk-U2	U	S	NA	2.30	NA	1.63	NA	NA
2	318	A	A-konk-U3	U	S	NA	2.10	NA	2.51	NA	NA
2	318	B	B-konk-U4	U	S	NA	2.00	NA	2.14	NA	NA
2	318	B	B-konk-U5	U	S	NA	2.20	NA	1.43	NA	NA
2	318	B	B-konk-U6	U	S	NA	2.10	NA	1.10	NA	NA
2	318	C	C-konk-U7	U	S	NA	1.90	NA	2.64	NA	NA
2	318	C	C-konk-U8	U	S	NA	2.20	NA	1.57	NA	NA
2	318	C	C-konk-U9	U	S	NA	2.10	NA	0.94	NA	NA
2	318	A	A-mono-U1	U	U	NA	1.90	NA	0.63	NA	NA
2	318	A	A-mono-U2	U	U	NA	2.00	NA	0.16	NA	NA
2	318	A	A-mono-U3	U	U	NA	2.10	NA	0.19	NA	NA
2	318	B	B-mono-U4	U	U	NA	1.80	NA	0.07	NA	NA
2	318	B	B-mono-U5	U	U	NA	2.10	NA	0.16	NA	NA
2	318	B	B-mono-U6	U	U	NA	1.80	NA	0.09	NA	NA
2	318	C	C-mono-U7	U	U	NA	2.00	NA	0.07	NA	NA
2	318	C	C-mono-U8	U	U	NA	1.60	NA	0.13	NA	NA
2	318	C	C-mono-U9	U	U	NA	2.00	NA	0.16	NA	NA
3	342	A	A-solo-S1	S	N	NA	2.50	39	8.25	588	NA
3	342	A	A-solo-S2	S	N	NA	2.90	30	8.17	639	NA
3	342	A	A-solo-S3	S	N	NA	2.90	57	4.78	861	NA
3	342	B	B-solo-S4	S	N	NA	2.80	26	3.47	534	NA
3	342	B	B-solo-S5	S	N	NA	2.80	40	4.18	744	NA
3	342	B	B-solo-S6	S	N	NA	2.70	39	4.90	1161	NA
3	342	C	C-solo-S7	S	N	NA	2.90	38	1.63	771	NA
3	342	C	C-solo-S8	S	N	NA	3.00	27	2.12	462	NA
3	342	C	C-solo-S9	S	N	NA	2.60	45	7.52	705	NA
3	342	A	A-mono-S1	S	S	NA	2.90	6	3.13	19	NA
3	342	A	A-mono-S2	S	S	NA	2.80	12	0.99	30	NA
3	342	A	A-mono-S3	S	S	NA	2.90	11	5.89	22	NA
3	342	B	B-mono-S4	S	S	NA	2.90	7	3.77	96	NA
3	342	B	B-mono-S5	S	S	NA	2.80	9	0.75	59	NA
3	342	B	B-mono-S6	S	S	NA	2.90	7	0.99	76	NA
3	342	C	C-mono-S7	S	S	NA	2.20	4	0.80	15	NA
3	342	C	C-mono-S8	S	S	NA	2.10	9	1.10	33	NA
3	342	C	C-mono-S9	S	S	NA	2.70	15	1.63	46	NA
3	342	A	A-konk-S1	S	U	NA	2.50	4	2.36	47	NA
3	342	A	A-konk-S2	S	U	NA	2.60	8	3.13	106	NA
3	342	A	A-konk-S3	S	U	NA	2.10	5	2.45	75	NA
3	342	B	B-konk-S4	S	U	NA	NA	NA	NA	NA	NA
3	342	B	B-konk-S5	S	U	NA	2.90	5	1.20	162	NA
3	342	B	B-konk-S6	S	U	NA	2.30	5	4.15	74	NA
3	342	C	C-konk-S7	S	U	NA	1.80	6	3.52	53	NA
3	342	C	C-konk-S8	S	U	NA	2.20	5	1.18	79	NA
3	342	C	C-konk-S9	S	U	NA	2.70	5	1.18	62	NA
3	342	A	A-solo-U1	U	N	NA	2.30	NA	4.71	NA	NA
3	342	A	A-solo-U2	U	N	NA	2.20	NA	2.25	NA	NA
3	342	A	A-solo-U3	U	N	NA	2.40	NA	2.36	NA	NA
3	342	B	B-solo-U4	U	N	NA	2.80	NA	6.38	NA	NA
3	342	B	B-solo-U5	U	N	NA	2.80	NA	3.97	NA	NA
3	342	B	B-solo-U6	U	N	NA	2.00	NA	3.46	NA	NA
3	342	C	C-solo-U7	U	N	NA	2.10	NA	5.69	NA	NA
3	342	C	C-solo-U8	U	N	NA	2.70	NA	5.89	NA	NA
3	342	C	C-solo-U9	U	N	NA	2.40	NA	6.13	NA	NA
3	342	A	A-konk-U1	U	S	NA	2.50	NA	5.89	NA	NA
3	342	A	A-konk-U2	U	S	NA	1.60	NA	2.36	NA	NA
3	342	A	A-konk-U3	U	S	NA	2.10	NA	1.23	NA	NA
3	342	B	B-konk-U4	U	S	NA	1.20	NA	1.26	NA	NA
3	342	B	B-konk-U5	U	S	NA	2.50	NA	1.32	NA	NA
3	342	B	B-konk-U6	U	S	NA	1.00	NA	0.50	NA	NA
3	342	C	C-konk-U7	U	S	NA	1.20	NA	2.98	NA	NA
3	342	C	C-konk-U8	U	S	NA	2.20	NA	3.14	NA	NA
3	342	C	C-konk-U9	U	S	NA	1.80	NA	0.69	NA	NA
3	342	A	A-mono-U1	U	U	NA	2.10	NA	1.98	NA	NA
3	342	A	A-mono-U2	U	U	NA	2.30	NA	1.30	NA	NA
3	342	A	A-mono-U3	U	U	NA	2.20	NA	0.99	NA	NA
3	342	B	B-mono-U4	U	U	NA	2.90	NA	0.24	NA	NA
3	342	B	B-mono-U5	U	U	NA	2.20	NA	0.44	NA	NA
3	342	B	B-mono-U6	U	U	NA	2.10	NA	0.92	NA	NA
3	342	C	C-mono-U7	U	U	NA	2.20	NA	0.55	NA	NA
3	342	C	C-mono-U8	U	U	NA	2.20	NA	1.41	NA	NA
3	342	C	C-mono-U9	U	U	NA	2.80	NA	0.13	NA	NA
4	195	A	A-solo-S1	S	N	NA	1.85	37	1.17	68	NA
4	195	A	A-solo-S2	S	N	NA	1.75	41	0.75	41	NA
4	195	A	A-solo-S3	S	N	NA	2.10	54	1.43	131	NA
4	195	B	B-solo-S4	S	N	NA	1.75	26	0.78	4	NA
4	195	B	B-solo-S5	S	N	NA	1.70	40	0.94	34	NA
4	195	B	B-solo-S6	S	N	NA	1.90	31	2.27	180	NA
4	195	C	C-solo-S7	S	N	NA	2.15	48	1.23	201	NA
4	195	C	C-solo-S8	S	N	NA	1.65	24	0.75	9	NA
4	195	C	C-solo-S9	S	N	NA	1.95	45	1.18	69	NA
4	195	A	A-mono-S1	S	S	NA	1.30	2	0.12	0	NA
4	195	A	A-mono-S2	S	S	NA	1.35	5	0.09	0	NA
4	195	A	A-mono-S3	S	S	NA	1.55	12	0.20	0	NA
4	195	B	B-mono-S4	S	S	NA	1.45	7	0.14	0	NA
4	195	B	B-mono-S5	S	S	NA	1.35	4	0.09	0	NA
4	195	B	B-mono-S6	S	S	NA	1.60	6	0.16	2	NA
4	195	C	C-mono-S7	S	S	NA	1.55	2	0.03	0	NA
4	195	C	C-mono-S8	S	S	NA	1.75	9	0.14	0	NA
4	195	C	C-mono-S9	S	S	NA	1.45	13	0.14	0	NA
4	195	A	A-konk-S1	S	U	NA	1.70	2	0.12	13	NA
4	195	A	A-konk-S2	S	U	NA	1.10	6	0.14	0	NA
4	195	A	A-konk-S3	S	U	NA	1.55	2	0.11	4	NA
4	195	B	B-konk-S4	S	U	NA	NA	NA	NA	NA	NA
4	195	B	B-konk-S5	S	U	NA	1.65	7	0.33	22	NA
4	195	B	B-konk-S6	S	U	NA	1.70	6	0.28	22	NA
4	195	C	C-konk-S7	S	U	NA	1.50	3	0.19	17	NA
4	195	C	C-konk-S8	S	U	NA	1.90	5	0.19	36	NA
4	195	C	C-konk-S9	S	U	NA	1.50	5	0.21	1	NA
4	195	A	A-solo-U1	U	N	NA	1.50	NA	0.93	NA	NA
4	195	A	A-solo-U2	U	N	NA	1.45	NA	0.43	NA	NA
4	195	A	A-solo-U3	U	N	NA	1.75	NA	0.67	NA	NA
4	195	B	B-solo-U4	U	N	NA	1.50	NA	1.92	NA	NA
4	195	B	B-solo-U5	U	N	NA	1.60	NA	1.52	NA	NA
4	195	B	B-solo-U6	U	N	NA	1.40	NA	1.08	NA	NA
4	195	C	C-solo-U7	U	N	NA	1.35	NA	1.83	NA	NA
4	195	C	C-solo-U8	U	N	NA	1.60	NA	1.13	NA	NA
4	195	C	C-solo-U9	U	N	NA	1.60	NA	1.13	NA	NA
4	195	A	A-konk-U1	U	S	NA	1.95	NA	0.41	NA	NA
4	195	A	A-konk-U2	U	S	NA	1.50	NA	0.75	NA	NA
4	195	A	A-konk-U3	U	S	NA	1.65	NA	0.11	NA	NA
4	195	B	B-konk-U4	U	S	NA	1.20	NA	0.15	NA	NA
4	195	B	B-konk-U5	U	S	NA	1.55	NA	0.17	NA	NA
4	195	B	B-konk-U6	U	S	NA	1.40	NA	0.07	NA	NA
4	195	C	C-konk-U7	U	S	NA	1.60	NA	0.09	NA	NA
4	195	C	C-konk-U8	U	S	NA	1.50	NA	0.07	NA	NA
4	195	C	C-konk-U9	U	S	NA	1.45	NA	0.12	NA	NA
4	195	A	A-mono-U1	U	U	NA	1.50	NA	0.08	NA	NA
4	195	A	A-mono-U2	U	U	NA	1.55	NA	0.11	NA	NA
4	195	A	A-mono-U3	U	U	NA	1.55	NA	0.07	NA	NA
4	195	B	B-mono-U4	U	U	NA	1.30	NA	0.10	NA	NA
4	195	B	B-mono-U5	U	U	NA	1.40	NA	0.05	NA	NA
4	195	B	B-mono-U6	U	U	NA	1.20	NA	0.07	NA	NA
4	195	C	C-mono-U7	U	U	NA	1.60	NA	0.12	NA	NA
4	195	C	C-mono-U8	U	U	NA	1.35	NA	0.05	NA	NA
4	195	C	C-mono-U9	U	U	NA	1.55	NA	0.09	NA	NA
